# Supplementary material for: Effect of public corruption on the COVID-19 immunization progress
Source: PubMed Central journal article supplement (PMC8648879; doi:10.1038/s41598-021-02802-1), 2021-12-06
Supplement: 41598_2021_2802_MOESM1_ESM.pdf [file 41598_2021_2802_MOESM1_ESM.pdf]

# Effect of Public Corruption on the COVID-19 Immunization Progress

**Mohammad Reza Farzanegan<sup>123\*</sup> and Hans Philipp Hofmann<sup>1</sup>**

<sup>1</sup> Economics of the Middle East Research Group & School of Business and Economics, Center for Near and Middle Eastern Studies, Deutschhausstr. 12, 35037 Marburg, Germany

<sup>2</sup> CESifo (Munich, Germany), <sup>3</sup> ERF (Cairo, Egypt)

\* email: [farzanegan@uni-marburg.de](mailto:farzanegan@uni-marburg.de)

## Appendix

### Data description and availability

| Dependent Variables           | Definition                                                                                                          | Source                                                                                                                                                                                                                                                                                                                                                                                                                                                                              |
|-------------------------------|---------------------------------------------------------------------------------------------------------------------|-------------------------------------------------------------------------------------------------------------------------------------------------------------------------------------------------------------------------------------------------------------------------------------------------------------------------------------------------------------------------------------------------------------------------------------------------------------------------------------|
| Given 1dose                   | People vaccinated at least once with Covid-19 vaccinations as of 30.08.2021 in % of the population                  | Bloomberg<br><a href="https://www.bloomberg.com/graphics/covid-vaccine-tracker-global-distribution/">https://www.bloomberg.com/graphics/covid-vaccine-tracker-global-distribution/</a>                                                                                                                                                                                                                                                                                              |
| Fully vaccinated              | Completed Covid-19 vaccinations as of 30.08.2021 in % of the population                                             | Bloomberg<br><a href="https://www.bloomberg.com/graphics/covid-vaccine-tracker-global-distribution/">https://www.bloomberg.com/graphics/covid-vaccine-tracker-global-distribution/</a>                                                                                                                                                                                                                                                                                              |
| <b>Explanatory Variables</b>  |                                                                                                                     |                                                                                                                                                                                                                                                                                                                                                                                                                                                                                     |
| Corruption (WGI)              | Control of corruption: Estimate, latest year available: 2020*-1                                                     | Worldwide Governance Indicators<br><a href="https://databank.worldbank.org/source/worldwide-governance-indicators">https://databank.worldbank.org/source/worldwide-governance-indicators</a>                                                                                                                                                                                                                                                                                        |
| Corruption (TI)               | 100- Corruption perceptions index scores 2020                                                                       | Transparency International<br><a href="https://www.transparency.org/en/cpi/2020/index/nzl">https://www.transparency.org/en/cpi/2020/index/nzl</a>                                                                                                                                                                                                                                                                                                                                   |
| GDP per capita                | Log of GDP per capita, (constant 2010 US\$), average 2017-2019                                                      | World Development Indicators<br><a href="https://databank.worldbank.org/source/world-development-indicators">https://databank.worldbank.org/source/world-development-indicators</a>                                                                                                                                                                                                                                                                                                 |
| Physicians                    | Log of Physicians (per 1,000 people), average 2017-2019                                                             | World Development Indicators<br><a href="https://databank.worldbank.org/source/world-development-indicators">https://databank.worldbank.org/source/world-development-indicators</a>                                                                                                                                                                                                                                                                                                 |
| Government health expenditure | Log of domestic general government health expenditure per capita, PPP (current international \$), average 2017-2019 | World Development Indicators<br><a href="https://databank.worldbank.org/source/world-development-indicators">https://databank.worldbank.org/source/world-development-indicators</a>                                                                                                                                                                                                                                                                                                 |
| Nurses and midwives           | Log of nurses and midwives (per 1,000 people), average 2017-2019                                                    | World Development Indicators<br><a href="https://databank.worldbank.org/source/world-development-indicators">https://databank.worldbank.org/source/world-development-indicators</a>                                                                                                                                                                                                                                                                                                 |
| Urban population              | Urban population (% of total population), average 2017-2019                                                         | World Development Indicators<br><a href="https://databank.worldbank.org/source/world-development-indicators">https://databank.worldbank.org/source/world-development-indicators</a>                                                                                                                                                                                                                                                                                                 |
| Polity2 index                 | Combined Polity 2 Score in 2018 from -10 (full autocracy) to 10 (full democracy)                                    | Marshall, M. G., Gurr, T. R. & Jagers, K. Polity IV Project. Center for Systemic Peace (2019). Data available under the following link:<br><a href="https://www.systemicpeace.org/inscrdata.html">https://www.systemicpeace.org/inscrdata.html</a>                                                                                                                                                                                                                                  |
| Government effectiveness      | Government effectiveness: Estimate, latest year available: 2020                                                     | Worldwide Governance Indicators<br><a href="https://databank.worldbank.org/source/worldwide-governance-indicators">https://databank.worldbank.org/source/worldwide-governance-indicators</a>                                                                                                                                                                                                                                                                                        |
| Fractionalization             | Historical Index of Ethnic Fractionalization                                                                        | Drazanova, L. Historical Index of Ethnic Fractionalization (HIEF). Harvard Dataverse, V2; <a href="https://dataverse.harvard.edu/dataset.xhtml?persistentId=doi:10.7910/DVN/4JQRCL">10.7910/DVN/4JQRCL</a> (2019).                                                                                                                                                                                                                                                                  |
| Globalization                 | KOF Globalisation Index in 2018                                                                                     | Gygli, S., Haelg, F., Potrafke, N. & Sturm, J.-E. The KOF Globalisation Index – Revisited. Review of International Organizations 14, 543–574; <a href="https://doi.org/10.1007/s11558-019-09344-2">10.1007/s11558-019-09344-2</a> (2019). Data available under the following link:<br><a href="https://kof.ethz.ch/en/forecasts-and-indicators/indicators/kof-globalisation-index.html">https://kof.ethz.ch/en/forecasts-and-indicators/indicators/kof-globalisation-index.html</a> |
